# Supplementary material for: Electronic structure modification of ultrathin MnFeOOH and integration with Ni3S2 as bifunctional electrocatalysts for improved alkaline water splitting
Source: Royal Society of Chemistry journal article supplement (doi:10.1039/d3cy01556d), 2023-12-20
Supplement: d3cy01556d1.pdf [file d3cy01556d1.pdf]

## Supporting Information

### **Electronic structure modification of ultrathin MnFeOOH and integration with Ni<sub>3</sub>S<sub>2</sub> as bifunctional electrocatalysts for improved alkaline water splitting**

Fu-Min Wang and Si-Fu Tang\*

College of Chemistry and Pharmaceutical Sciences, Qingdao Agricultural University,  
Changcheng Road 700, Chengyang District, Qingdao 266109, China.

\*Corresponding author: tangsf@qau.edu.cn.

#### **Chemicals**

NiCl<sub>2</sub>·6H<sub>2</sub>O and MnCl<sub>2</sub>·4H<sub>2</sub>O (Tianjin Aopusheng), thiourea from (Tianjin BASF), FeCl<sub>3</sub>·6H<sub>2</sub>O (Sinopharm), anhydrous ethanol (Yantai Sanhe), nickel foam (NF, 1.0 mm thick, Suzhou Sinero) were all analytical grade and purchased from commercial sources. Before use, the NF was ultrasonic cleaned with 1.0 M HCl, deionized water and anhydrous ethanol to remove the oxide layer and impurities on the surface, and then dried overnight in a vacuum oven at 60 °C.

#### **Instruments**

The powder X-ray diffraction (PXRD) measurements of the samples were measured by a polycrystalline X-ray diffractometer (TD-3700) using CuK $\alpha$  radiation. The morphology and elemental mapping of the samples were photographed by the JEOL JSM-IT 500 scanning electron microscope (SEM) equipped with an energy dispersive spectrometer (EDS) system (OXFORD INSTRUMENT, EDAX GENESIS). Inductively coupled plasma-optical emission spectroscopy (ICP-OES) measurements were carried out on PE OPTMA8000DV. X-ray photoelectron spectroscopy (XPS) was recorded on a VG ESCALABMK II spectrometer using an Al K $\alpha$  (1486.6 eV) photon source, and charging calibrated according to the C 1s peak at 284.8 eV. The thickness of the MnFeOOH nanosheet was measured by atomic force microscopy (AFM) (SHIMADZU SPM-9700HT03040111). The contact angles were measured on Germany KRUSS Cluis DSA25 standard contact angle measuring instrument. The Raman spectra were recorded on a Raman microscopy (DXR2xi, ThermoFisher).

#### **Electrochemical Measurements**

All the electrochemical studies were conducted on an electrochemical workstation (CHI 760E) equipped with a three-electrode electrochemical cell in 1.0 M KOH aqueous solution with the prepared catalyst as the working electrode and Hg/HgO as the reference electrode. Platinum plate (1.0 × 1.0 cm<sup>2</sup>) and graphite rod (diameter: 0.9 cm) was used as the counter electrode for the OER and HER measurements, respectively. The potentials vs. Hg/HgO were converted to reversible hydrogen electrode (RHE) according to the equation:  $E_{\text{RHE}} = E_{\text{Hg/HgO}} + 0.059\text{pH} + 0.098 \text{ V}$ . The linear sweep voltammetry (LSV) curves were measured at a sweep rate of 5 mV s<sup>-1</sup> with 75% iR compensation. The Tafel slope was obtained from the LSV polarization

curve based on the Tafel equation. The electrochemical impedance spectroscopy (EIS) was conducted in a frequency range of 100 kHz - 0.01 Hz with an amplitude of 5 mV. Cyclic voltammetry (CV) scans in the appropriate non-Faraday voltage window at different scanning rates were used to determine the double-layer capacitance ( $C_{dl}$ ) and evaluate the electrochemical active surface area (ECSA). In addition, the electrochemical stability was tested for up to 20 h by chronoamperometry method.

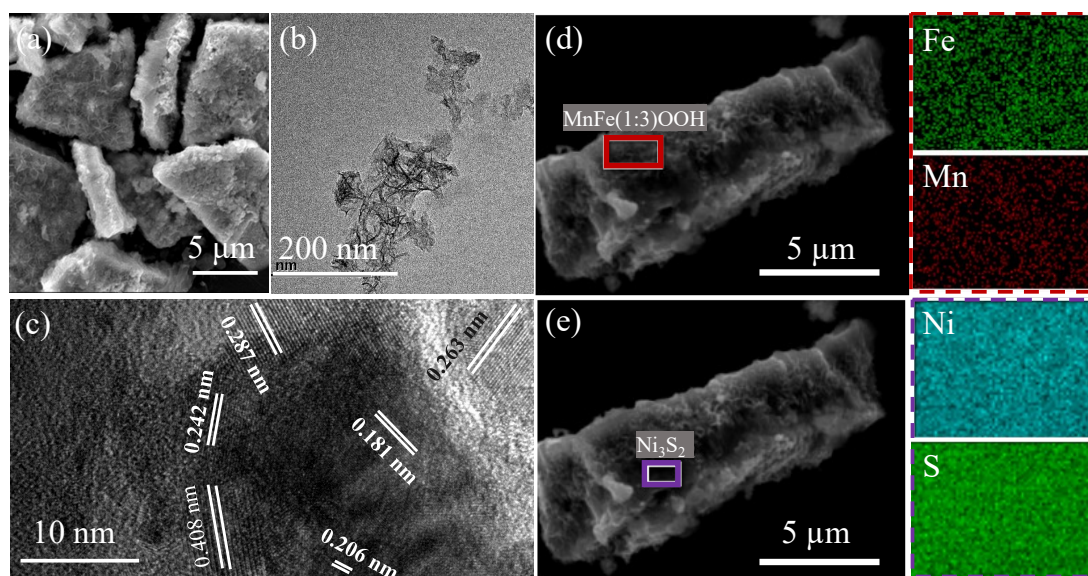

Figure S1. SEM (a), TEM (b), HRTEM (c) and EDS (d, e) images of MnFe(1:3)OOH/Ni<sub>3</sub>S<sub>2</sub>/NF.

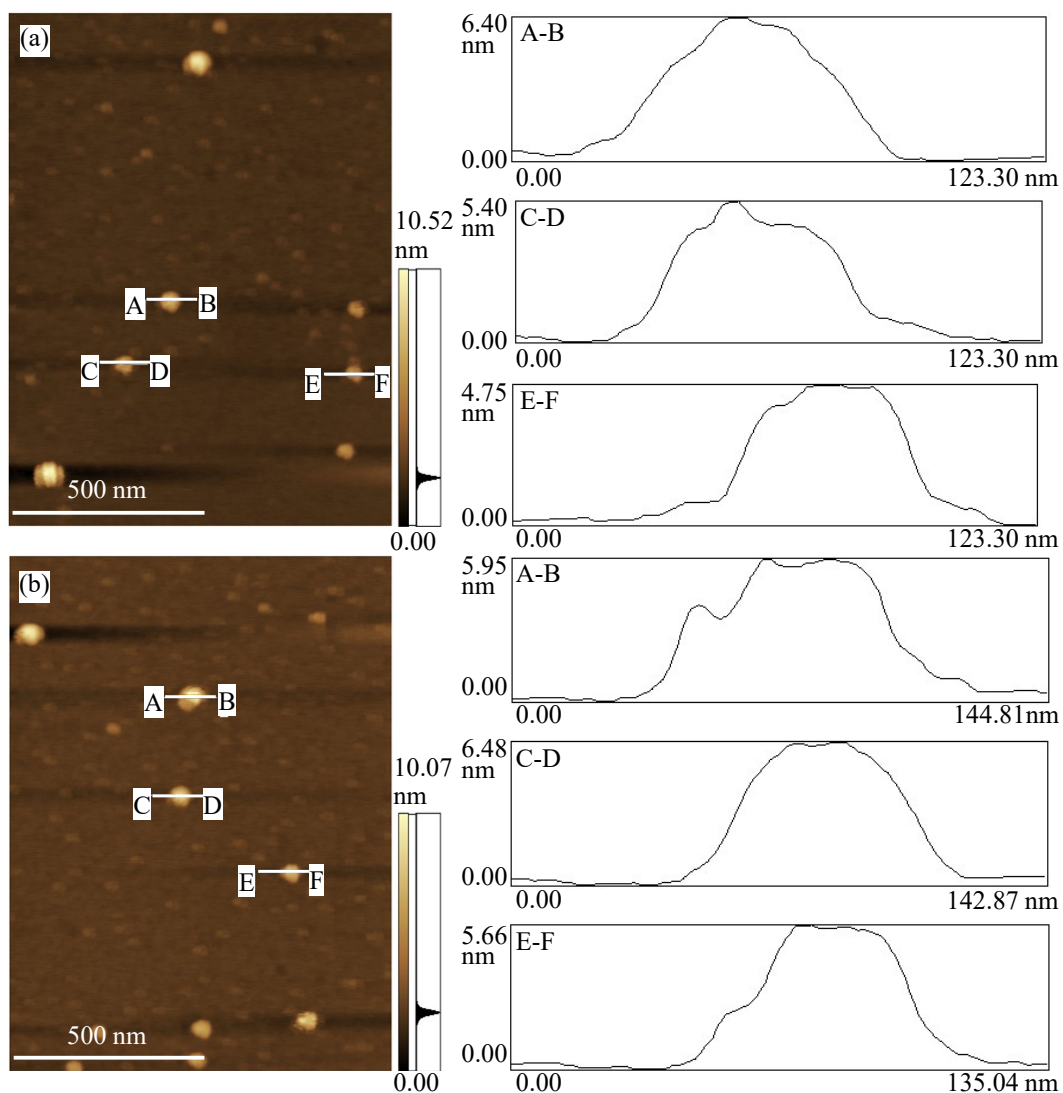

Figure S2. AFM images of MnFe(2:1)OOH/Ni<sub>3</sub>S<sub>2</sub>/NF (a) and MnFe(1:3)OOH/Ni<sub>3</sub>S<sub>2</sub>/NF (b).

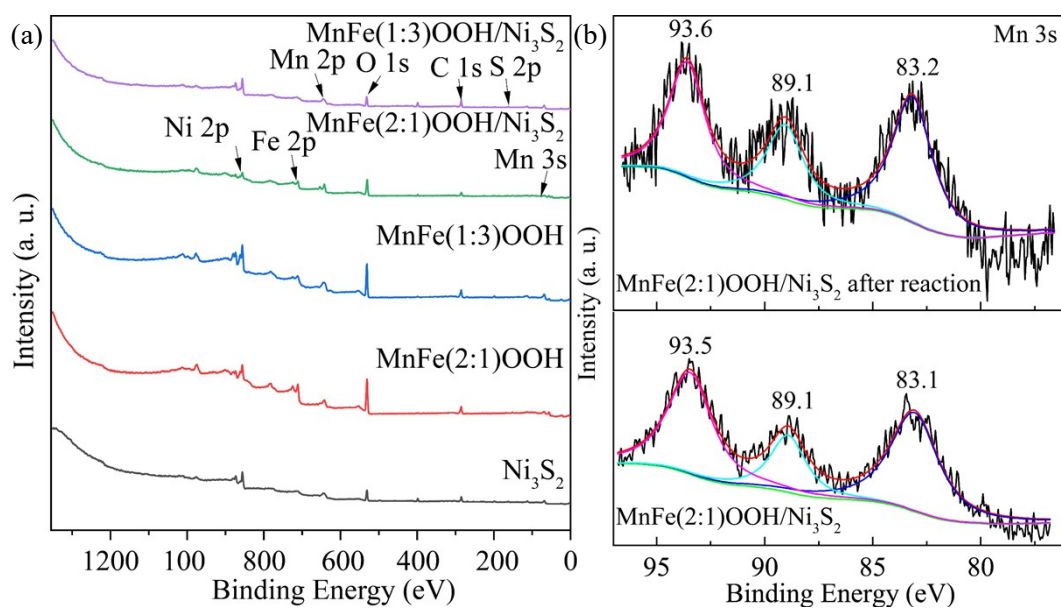

Figure S3. XPS survey and Mn 3s spectra of the catalysts.

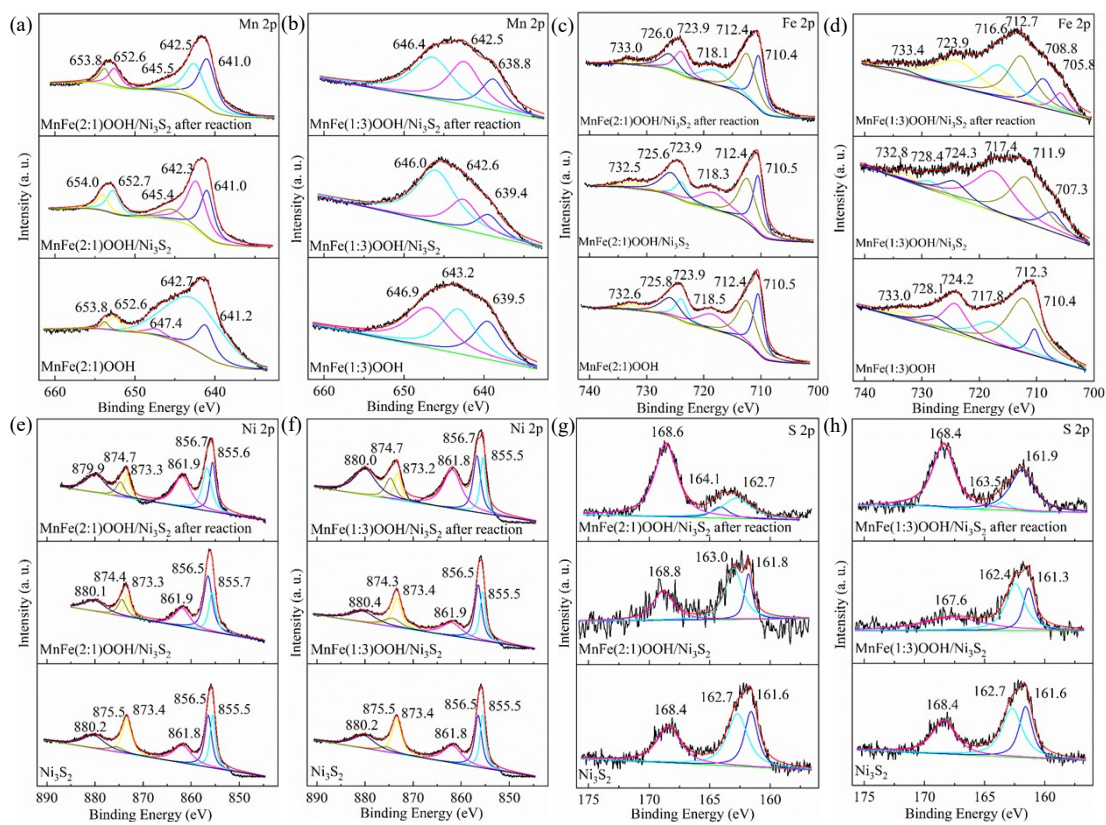

Figure S4. XPS Mn 2p (a, b), Fe 2P (c, d), Ni 2p (e, f) and S 2p (g, h) spectra of  $\text{Ni}_3\text{S}_2$ ,  $\text{MnFe}(2:1)\text{OOH}$ ,  $\text{MnFe}(1:3)\text{OOH}$ ,  $\text{MnFe}(2:1)\text{OOH}/\text{Ni}_3\text{S}_2/\text{NF}$  and  $\text{MnFe}(1:3)\text{OOH}/\text{Ni}_3\text{S}_2/\text{NF}$ .

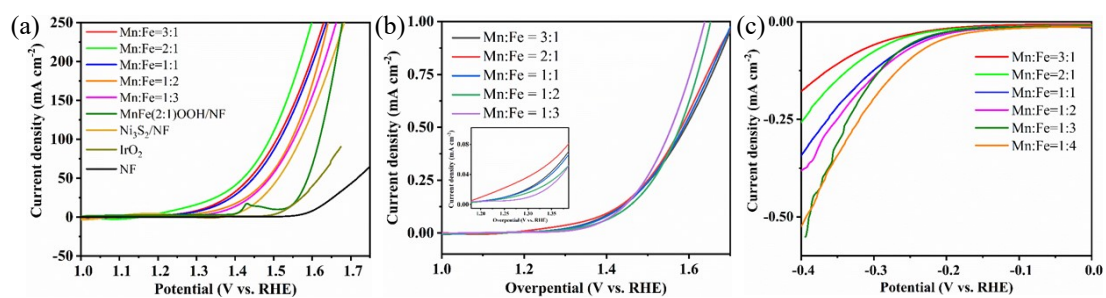

Figure S5. Fitted (a) and ECSA-normalized (b) OER LSV curves (the inset in the enlarged view of the LSV curves in the range of 1.2-1.4 V vs. RHE) and ECSA-normalized HER LSV curves (c) of the catalysts.

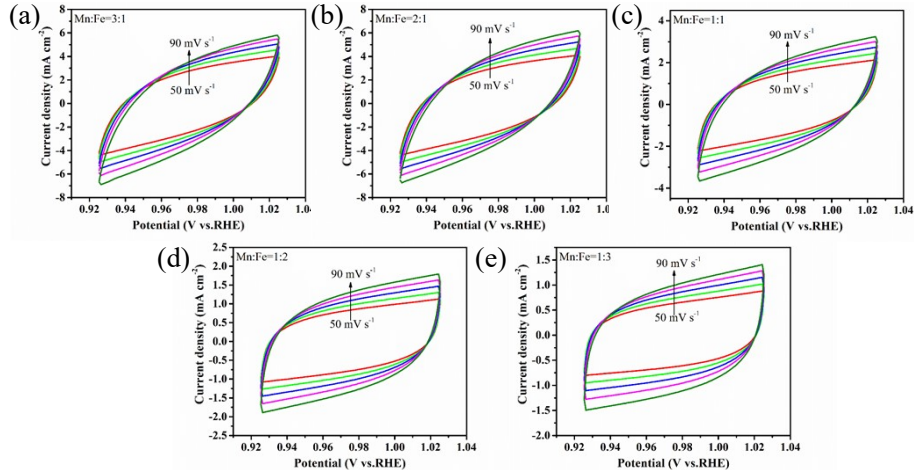

Figure S6. OER CV diagrams of MnFe(3:1)OOH/Ni<sub>3</sub>S<sub>2</sub>/NF (a), MnFe(2:1)OOH/Ni<sub>3</sub>S<sub>2</sub>/NF (b), MnFe(1:1)OOH/Ni<sub>3</sub>S<sub>2</sub>/NF (c), MnFe(1:2)OOH/Ni<sub>3</sub>S<sub>2</sub>/NF (d), MnFe(1:3)OOH/Ni<sub>3</sub>S<sub>2</sub>/NF (e) at different scanning rates of 50, 60, 70, 80 and 90 mV s<sup>-1</sup>.

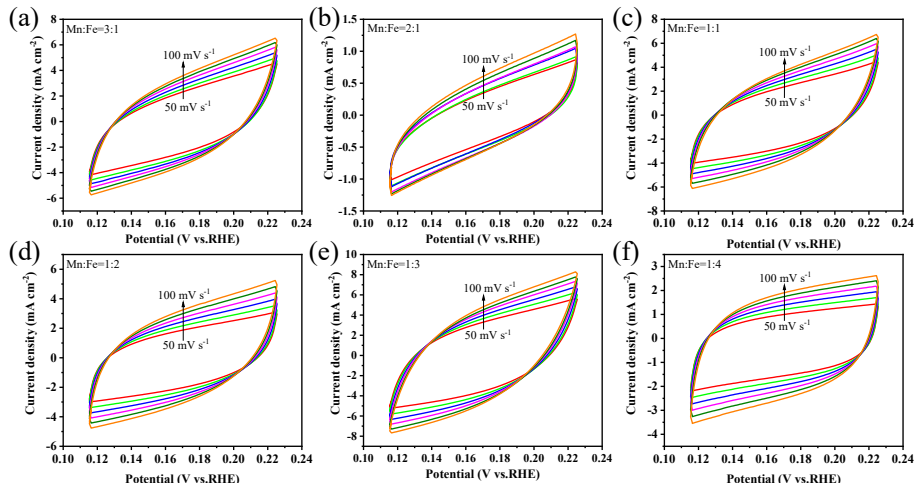

Figure S7. HER CV diagrams of MnFe(3:1)OOH/Ni<sub>3</sub>S<sub>2</sub>/NF (a), MnFe(2:1)OOH/Ni<sub>3</sub>S<sub>2</sub>/NF (b), MnFe(1:1)OOH/Ni<sub>3</sub>S<sub>2</sub>/NF (c), MnFe(1:2)OOH/Ni<sub>3</sub>S<sub>2</sub>/NF (d), MnFe(1:3)OOH/Ni<sub>3</sub>S<sub>2</sub>/NF (e) and MnFe(1:4)OOH/Ni<sub>3</sub>S<sub>2</sub>/NF (f) at different scanning rates of 50, 60, 70, 80, 90 and 100 mV s<sup>-1</sup>.

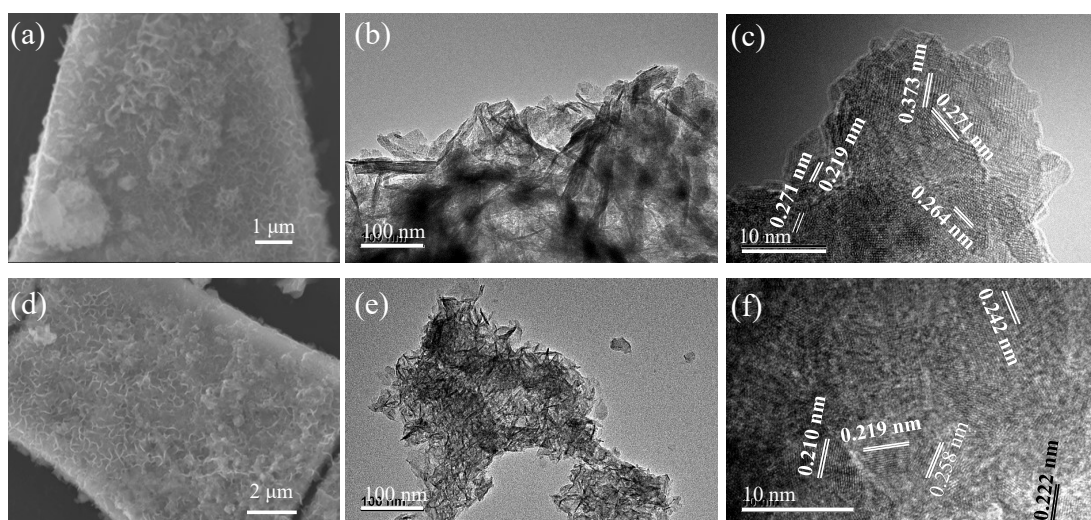

Figure S8. SEM (a), TEM (b) and HRTEM (c) images of MnFe(2:1)OOH/Ni<sub>3</sub>S<sub>2</sub>/NF after OER reaction; SEM (d), TEM (e) and HRTEM (f) images of MnFe(1:3)OOH/Ni<sub>3</sub>S<sub>2</sub>/NF after HER reaction.

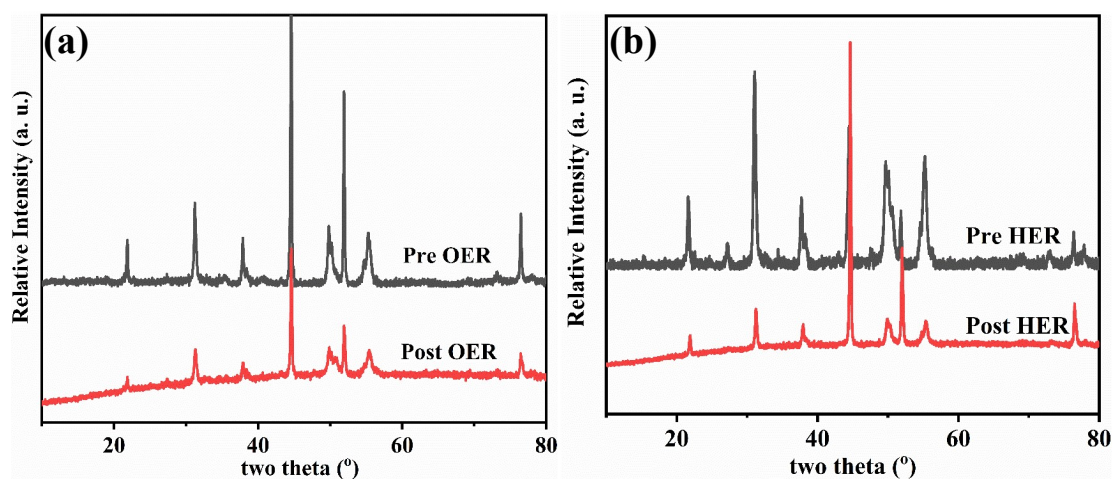

Figure S9. XRD patterns of MnFe(2:1)OOH/Ni<sub>3</sub>S<sub>2</sub>/NF (a) and MnFe(1:3)OOH/Ni<sub>3</sub>S<sub>2</sub>/NF (b) before and after reaction.

Table S1. OER electrochemistry results of some metal sulfides and their composite catalysts in 1.0 M KOH.

| catalysts                                                             | $\eta_{10}$ | $\eta_{50}$ | $\eta_{100}$ | reference |
|-----------------------------------------------------------------------|-------------|-------------|--------------|-----------|
| Fe(OH) <sub>3</sub> @Ni <sub>3</sub> S <sub>2</sub> /NF-D1-30         | 173         | 242         | --           | 1         |
| $\gamma$ -FeOOH/Ni <sub>3</sub> S <sub>2</sub>                        | --          | 279         | --           | 2         |
| Ni <sub>3</sub> S <sub>2</sub> @MoS <sub>2</sub> /FeOOH               | 234         | --          | --           | 3         |
| Ni <sub>3</sub> S <sub>2</sub> /Co <sub>3</sub> S <sub>4</sub> /FeOOH | 181         | --          | --           | 4         |
| Ni <sub>3</sub> S <sub>2</sub> /MoS <sub>2</sub> /FeOOH               | --          | --          | 219          | 5         |
| $\delta$ -FeOOH/Ni <sub>3</sub> S <sub>2</sub>                        | 187         | --          | --           | 6         |
| Ni(Fe)OOH/Ni(Fe)S <sub>x</sub>                                        | 227         | --          | --           | 7         |
| Fe11.8%-Ni <sub>3</sub> S <sub>2</sub> /NF                            | --          | --          | 253          | 8         |

|                                                                      |     |     |       |           |
|----------------------------------------------------------------------|-----|-----|-------|-----------|
| NiFe-S-13@CNFs                                                       | 270 | --  | --    | 9         |
| MoS <sub>2</sub> /Ni <sub>3</sub> S <sub>2</sub>                     | 185 | --  | --    | 10        |
| Mo-W-S-2@Ni <sub>3</sub> S <sub>2</sub>                              | 285 | --  | --    | 11        |
| V-Ni <sub>3</sub> S <sub>2</sub> @NiO                                | 170 | --  | 310   | 12        |
| Ni <sub>3</sub> S <sub>2</sub> -CoMoS <sub>x</sub>                   | 234 | --  | --    | 13        |
| Ni <sub>3</sub> S <sub>2</sub> @FeNi <sub>2</sub> S <sub>4</sub> @NF | 235 | --  | --    | 14        |
| FeS/Ni <sub>3</sub> S <sub>2</sub> @NF                               | 192 | --  | --    | 15        |
| FeOOH/Ga-Ni <sub>3</sub> S <sub>2</sub>                              | --  | 235 | 274   | 16        |
| MnFe(2:1)OOH/Ni <sub>3</sub> S <sub>2</sub> /NF                      | --  | --  | 268.4 | This work |

Table S2. HER electrochemistry results of some metal sulfides and their composite catalysts in 1.0 M KOH.

| catalysts                                                             | $\eta_{10}$ | $\eta_{50}$ | $\eta_{100}$ | reference |
|-----------------------------------------------------------------------|-------------|-------------|--------------|-----------|
| $\gamma$ -FeOOH/Ni <sub>3</sub> S <sub>2</sub>                        | 92          | --          | --           | 2         |
| Ni <sub>3</sub> S <sub>2</sub> @MoS <sub>2</sub> /FeOOH               | 95          | --          | --           | 3         |
| Ni <sub>3</sub> S <sub>2</sub> /Co <sub>3</sub> S <sub>4</sub> /FeOOH | 158         | --          | --           | 4         |
| Ni <sub>3</sub> S <sub>2</sub> /MoS <sub>2</sub> /FeOOH               | 76          | --          | --           | 5         |
| $\delta$ -FeOOH/Ni <sub>3</sub> S <sub>2</sub>                        | 106         | --          | --           | 6         |
| MoS <sub>2</sub> /Ni <sub>3</sub> S <sub>2</sub>                      | 99          | --          | --           | 10        |
| Mo-W-S-2@Ni <sub>3</sub> S <sub>2</sub>                               | 98          | --          | --           | 11        |
| V-Ni <sub>3</sub> S <sub>2</sub> @NiO                                 | 112         | --          | 239          | 12        |
| Ni <sub>3</sub> S <sub>2</sub> -CoMoS <sub>x</sub>                    | 90          | --          | --           | 13        |
| Ni <sub>3</sub> S <sub>2</sub> @FeNi <sub>2</sub> S <sub>4</sub> @NF  | 83          | --          | --           | 14        |
| FeS/Ni <sub>3</sub> S <sub>2</sub> @NF                                | 130         | --          | --           | 15        |
| MnFe(1:3)OOH/Ni <sub>3</sub> S <sub>2</sub> /NF                       | 94.6        | 257.6       | 294.6        | This work |

Table S3. Cell voltages of some Ni<sub>3</sub>S<sub>2</sub>, FeOOH, MnOOH and their composite catalysts in 1.0 M KOH.

| catalysts                                                                                        | Cell voltage at 10 mA/cm <sup>2</sup> | reference |
|--------------------------------------------------------------------------------------------------|---------------------------------------|-----------|
| $\gamma$ -FeOOH/Ni <sub>3</sub> S <sub>2</sub>                                                   | 1.66                                  | 2         |
| Ni <sub>3</sub> S <sub>2</sub> @MoS <sub>2</sub> /FeOOH                                          | 1.57                                  | 3         |
| Ni <sub>3</sub> S <sub>2</sub> /MoS <sub>2</sub> /FeOOH                                          | 1.58                                  | 5         |
| $\delta$ -FeOOH/Ni <sub>3</sub> S <sub>2</sub>                                                   | 1.53                                  | 6         |
| MoS <sub>2</sub> /Ni <sub>3</sub> S <sub>2</sub> /NF                                             | 1.50                                  | 10        |
| Mo-W-S-2@Ni <sub>3</sub> S <sub>2</sub>                                                          | 1.62                                  | 11        |
| V-Ni <sub>3</sub> S <sub>2</sub> @NiO                                                            | 1.52                                  | 12        |
| Ni <sub>3</sub> S <sub>2</sub> -CoMoS <sub>x</sub>                                               | 1.52                                  | 13        |
| NiO-Ni <sub>3</sub> S <sub>2</sub> /NF                                                           | 1.57                                  | 17        |
| Ni <sub>x</sub> Co <sub>3-x</sub> S <sub>4</sub> /Ni <sub>3</sub> S <sub>2</sub> /NF             | 1.53                                  | 18        |
| NiFe-LDHs @ $\gamma$ -MnOOH                                                                      | 1.69                                  | 19        |
| MnFe(2:1)OOH/Ni <sub>3</sub> S <sub>2</sub> /NF  MnFe(1:3)OOH/Ni <sub>3</sub> S <sub>2</sub> /NF | 1.60                                  | This work |

Reference:

- 1 H. Yan, R. Deng, C. Wang, H. Yao, S. Guo, R. Liu, S. Ma. *Electrochimica Acta*, 2022, **427**, 140889.
- 2 Y. Liu, M. Ding, Y. Tian, G. Zhao, J. Huang, X. Xu. *J. Colloid Interface Sci.*, 2023, **639**, 24–32
- 3 M. Zheng, K. Guo, W.-J. Jiang, T. Tang, X. Wang, P. Zhou, J. Du, Y. Zhao, C. Xu, J.-S. Hu. *Appl. Catal. B: Environ.*, 2019, **244**, 1004–1012.
- 4 C. Fan, X. Shen, J. Cheng, L. Lang, G. Liu, Z. Ji, G. Zhu. *Colloid Surface A*, 2021, **631**, 127689.
- 5 C. Fan, X. Yue, X. Shen, J. Cheng, W. Ke, Z. Ji, A. Yuan, G. Zhu. *ChemElectroChem*, 2021, **8**, 665-674.
- 6 X. Ji, C. Cheng, Z. Zang, L. Li, X. Li, Y. Cheng, X. Yang, X. Yu, Z. Lu, X. Zhang, H. Liu. *J. Mater. Chem. A*, 2020, **8**, 21199–21207.
- 7 M. Chen, W. Li, Y. Lu, P. Qi, H. Wu, G. Liu, Y. Zhao, Y. Tang. *J. Mater. Chem. A*, 2023, **11**, 4608–4618.
- 8 N. Cheng, Q. Liu, A. M. Asiri, W. Xing, X. Sun. *J. Mater. Chem. A*, 2015, **3**, 23207–23212.
- 9 Y. Li, W. Ma, J. Wang, Q. Zhong. *J. Mater. Chem. A*, 2022, **10**, 24388–24397.
- 10 F. Li, D. Zhang, R.-C. Xu, W.-F. Fu, X.-J. Lv. *ACS Appl. Energy Mater.* 2018, **1**, 3929–3936.
- 11 M. Zheng, J. Du, B. Hou, C.-L. Xu. *ACS Appl. Mater. Interfaces* 2017, **9**, 26066–26076.
- 12 Q. Liu, J. Huang, L. Cao, K. Kajiyoshi, K. Li, Y. Feng, C. Fu, L. Kou, L. Feng. *ACS Sustainable Chem. Eng.* 2020, **8**, 6222–6233.
- 13 L. Zhao, H. Ge, G. Zhang, F. Wang, G. Li. *Electrochim. Acta*, 2021, **387**, 138538.
- 14 Y. Yang, H. Meng, C. Kong, S. Yan, W. Ma, H. Zhu, F. Ma, C. Wang, Z. Hu. *J. Colloid Interface Sci.*, 2021, **599**, 300–312.
- 15 H. Li, S. Yang, W. Wei, M. Zhang, Z. Jiang, Z. Yan, J. Xie. *J. Colloid Interface Sci.*, 2022, **608**, 536–548.
- 16 R. Wang, Y. Yang, X. Xu, S. Chen, A. Trukhanov, R. Wang, L. Shao, X. Lu, H. Pan, Z. Sun. *Inorg. Chem. Front.*, 2023, **10**, 1348–1356.
- 17 L. Peng, J. Shen, X. Zheng, R. Xiang, M. Deng, Z. Mao, Z. Feng, L. Zhang, L. Li, Z. Wei. *J. Catal.*, 2019, **369**, 345–351.
- 18 Y. Wu, Y. Liu, G.-D. Li, X. Zou, X. Lian, D. Wang, L. Sun, T. Asefa, X. Zou. *Nano Energy*, 2017, **35**, 161–170.
- 19 S.-B. Wang, Y.-S. Xia, Z.-F. Xin, L.-X. Xu. *Catal. Commun.*, 2023, **173**, 106564.
